# Supplementary material
Source: MDPI journal article supplement (https://www.mdpi.com/2073-4468/11/4/67)
Supplement: s1 [file s1]

## Supplementary Information for: Rational Design and *in vivo* Characterization of mRNA-encoded Broadly Neutralizing Antibody Combinations Against HIV-1

**Table S1.** Neutralization antibody concentration inhibiting 80% of viral infection.

|                 | <b>IgG</b>        | <b>scFv-Fc.r1</b>   | <b>scFv-Fc.r2</b>  |
|-----------------|-------------------|---------------------|--------------------|
| <b>PGDM1400</b> |                   |                     |                    |
| Mean (SD)       | 3.75 (5.4)        | 21.05 (53.67)       | 31.76 (90.05)      |
| Median (IQR)    | 1.17 (0.13, 6.75) | 3.05 (0.38, 7.72)   | 1.64 (0.32, 12.56) |
| <b>10-1074</b>  |                   |                     |                    |
| Mean (SD)       | 1.13 (2.46)       | 2.59 (7.45)         | 1.05 (2.14)        |
| Median (IQR)    | 0.25 (0.07, 1.10) | 0.14 (0.04, 0.45)   | 0.24 (0.07, 0.91)  |
| <b>PGT121</b>   |                   |                     |                    |
| Mean (SD)       | 3.67 (8.2)        | 2.72 (7.21)         | 2.54 (7.16)        |
| Median (IQR)    | 0.13 (0.04, 0.56) | 0.16 (0.07, 0.45)   | 0.12 (0.05, 0.42)  |
| <b>3BNC117</b>  |                   |                     |                    |
| Mean (SD)       | 3.23 (7.43)       | 13.15 (11.08)       | 3.58 (3.37)        |
| Median (IQR)    | 0.55 (0.17, 1.61) | 11.09 (1.02, 25.00) | 2.21 (0.71, 5.97)  |
| <b>N6</b>       |                   |                     |                    |
| Mean (SD)       | 0.43 (0.51)       |                     | 2.73 (3.00)        |
| Median (IQR)    | 0.20 (0.05, 0.85) |                     | 1.33 (0.45, 5.24)  |
| <b>NIH45-46</b> |                   |                     |                    |
| Mean (SD)       | 0.38 (0.41)       |                     | 2.73 (3.00)        |
| Median (IQR)    | 0.24 (0.06, 0.75) |                     | 1.33 (0.45, 5.24)  |

IQR, interquartile range (25% percentile, 75% percentile); SD, standard deviation.

**Table S2.** scFv-Sc Round 2 Variant Mutations.

| <b>scFv-Sc Round 2 Variants</b> | <b>Mutations</b>                        |
|---------------------------------|-----------------------------------------|
| <b>PGDM1400</b>                 |                                         |
| Var_7                           | Linker20 (GGGGS) 4                      |
| Var_8                           | L20 + H:K23R                            |
| Var_9                           | L20 + H:K23R + H:K94F                   |
| Var_10                          | L20 + H:K19R                            |
| Var_11                          | L20 + H:K19R + S82AN                    |
| Var_12                          | L20 + S39Y                              |
| Var_13                          | VH_VL + L20                             |
| <b>10-1074</b>                  |                                         |
| Var_7                           | Linker20 (GGGGS)4                       |
| Var_8                           | L20 + H:S79Y                            |
| Var_9                           | L20 + H:S19R                            |
| Var_10                          | L20 + H:K81Q                            |
| Var_11                          | L20 + H:S18R + H:S79Y + H:K81Q          |
| Var_12                          | L20 + H:S18R + H:S79Y + H:K81Q + H:V68T |
| Var_13                          | L20 + H:L80Y                            |
| Var_14                          | L20 + H:S23Q                            |
| Var_15                          | L20 + H:S40R                            |
| Var_16                          | L20 + H:K13R                            |
| Var_17                          | L20 + H:K13R + S23Q                     |
| Var_18                          | VH_VL + L20                             |

| PGT121 |                                         |
|--------|-----------------------------------------|
| Var_7  | Linker20 (GGGGS)4                       |
| Var_7a | L20 + 68N_Rev                           |
| Var_8  | L20 + 68N_Rev + H:S79Y                  |
| Var_9  | L20 + 68N_Rev + H:S19R                  |
| Var_10 | L20 + 68N_Rev + H:S81Q                  |
| Var_11 | L20 + 68N_Rev+ H:S19R + H:S79Y + H:S81Q |
| Var_12 | L20 + H:S19R + H:S79Y + H:S81Q          |
| Var_13 | L20 + 68N_Rev + H:S81I                  |
| Var_14 | L20 + 68N_Rev + H:S23Q                  |
| Var_15 | L20 + 68N_Rev + L:S63M                  |
| Var_16 | VH_VL + L20                             |
| N6     |                                         |
| Var_2  | Linker20 (GGGGS)4                       |
| Var_3  | L20 + H:A10Y                            |
| Var_4  | L20 + H:K12R                            |
| Var_5  | L20 + H:D81Q                            |
| Var_6  | L20 + H:D81Q + H:R82AY                  |

Var, variant.

**Table S3.** Kinetic–Pharmacodynamic Model Parameters.

| Parameter (unit)        | Estimate |                         |                          |
|-------------------------|----------|-------------------------|--------------------------|
|                         | N6 IgG   | PGT121 scFv-Fc<br>Var7B | PGDM1400 scFv-Fc<br>Var7 |
| m                       | 0.862    | 0.566                   | 0.438                    |
| CL <sub>ab</sub> (mL/h) | 0.00111  | 0.000719                | 0.000507                 |
| t <sub>1/2</sub> (days) | 26.0     | 40.2                    | 57.0                     |

CL<sub>ab</sub>, the antibody clearance rate from the central compartment; Fc, crystallizable fragment; IgG, immunoglobulin G; M, linear slope parameter; scFv, single-chain variable fragment; t<sub>1/2</sub>, half-life.

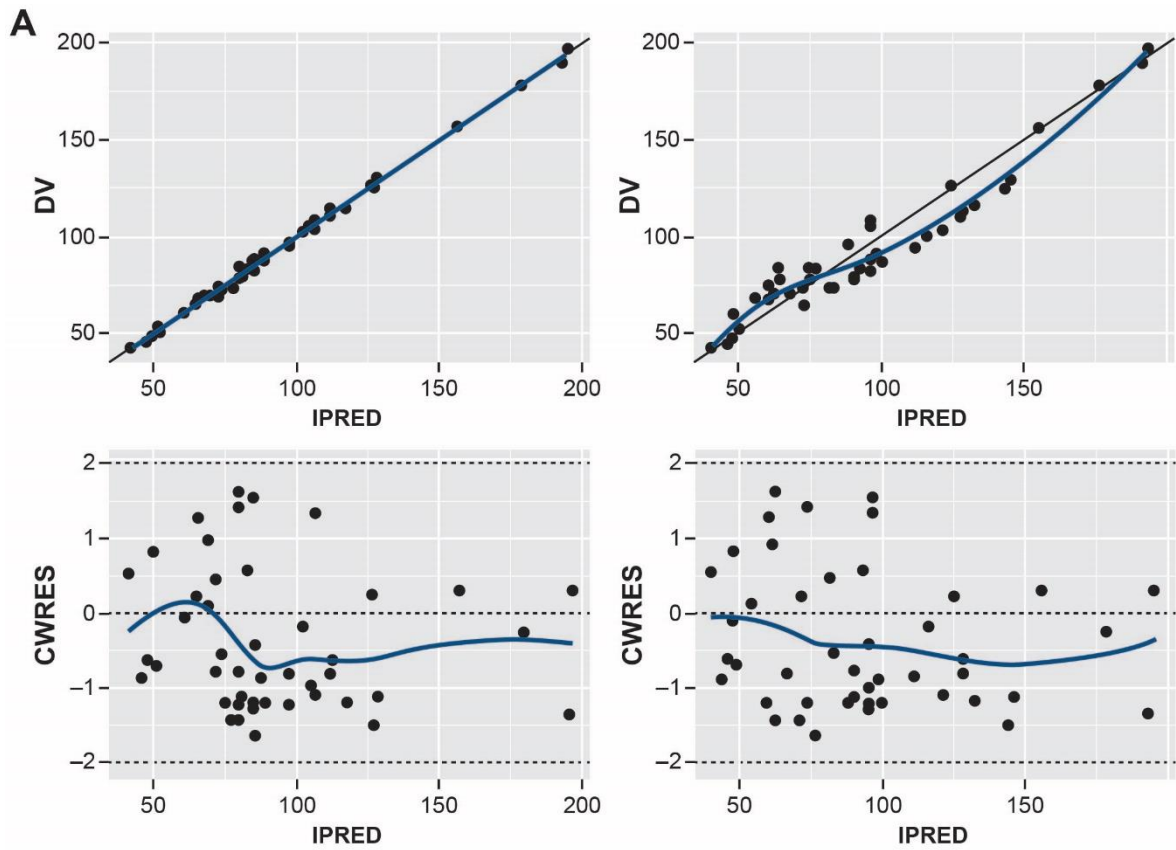

**B** DV, Dependent variable; IPRED, Individual fit; PRED, Population Fit; CWRES, Conditional weighted residuals

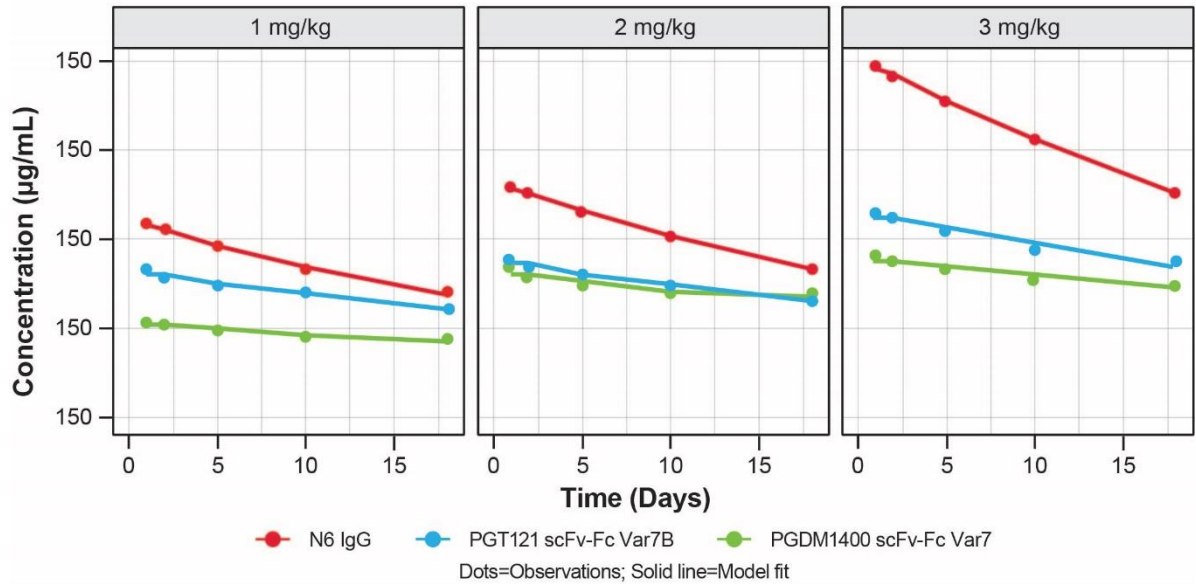

**Figure S1.** Kinetic-pharmacodynamic model diagnostics. (A) Goodness-of-fit plots and (B) fits for individual groups.
